# Supplementary material
Source: PubMed Central journal article supplement (PMC4269168)
Supplement: NIHMS644830-supplement-01.pdf [file NIHMS644830-supplement-01.pdf]

## Supplementary appendix

This appendix formed part of the original submission and has been peer reviewed. We post it as supplied by the authors.

Supplement to: Rosenberg ES, Millett GA, Sullivan PS, del Rio C, Curran JW. Understanding the HIV disparities between black and white men who have sex with men in the USA using the HIV care continuum: a modelling study. *Lancet HIV* 2014; published online Nov 18. [http://dx.doi.org/10.1016/S2352-3018\(14\)00011-3](http://dx.doi.org/10.1016/S2352-3018(14)00011-3).

**Appendix, Table 1.**  
**United States population parameters for incidence estimation**

| <b>Published quantities</b>                                                              | <b>Value</b> | <b>Reference</b>                                                      |
|------------------------------------------------------------------------------------------|--------------|-----------------------------------------------------------------------|
| A. Men who have sex with men (MSM) ages $\geq 13$ years, 2008                            | 4,791,262    | Purcell et al., 2012 <sup>1</sup>                                     |
| B. Male residents ages $\geq 13$ years, 2008                                             | 122,656,982  | United States Census Bureau <sup>2</sup>                              |
| C. Male residents ages $\geq 13$ years, 2010                                             | 124,732,856  | United States Census Bureau <sup>2</sup>                              |
| D. Male non-Hispanic black/African-American residents ages $\geq 13$ years, 2010         | 14,400,083   | United States Census Bureau <sup>2</sup>                              |
| E. Male non-Hispanic white residents ages $\geq 13$ years, 2010                          | 82,715,604   | United States Census Bureau <sup>2</sup>                              |
| <b>Derived quantities</b>                                                                | <b>Value</b> | <b>Formula</b>                                                        |
| F. Black/African-American MSM ages $\geq 13$ years, 2010                                 | 562,500      | $A \times (C/B) \times (D/C)$                                         |
| G. Black/African-American MSM ages $\geq 13$ years living with an HIV infection, 2010    | 180,477      | From Figure 1: Hall et al, 2013 <sup>3</sup> ; CDC, 2013 <sup>4</sup> |
| H. Black/African-American MSM ages $\geq 13$ years living without an HIV infection, 2010 | 382,024      | $F - G$                                                               |
| I. White MSM ages $\geq 13$ years, 2010                                                  | 3,231,061    | $A \times (C/B) \times (E/C)$                                         |
| J. White MSM ages $\geq 13$ years living with an HIV infection, 2010                     | 243,174      | From Figure 1: Hall et al, 2013 <sup>3</sup> ; CDC, 2013 <sup>4</sup> |
| K. White MSM ages $\geq 13$ years living without an HIV infection, 2010                  | 2,987,886    | $I - J$                                                               |

**Appendix, Table 2.**  
**Scenarios for sensitivity analyses of racial/ethnic mixing in serodiscordant relationships of MSM**

| Scenario                                                                                                 | Race/ethnicity of HIV-infected person | Race/ethnicity of HIV-uninfected partner |                            |                        | Notes                                                                                                                                                                                                                                                                                                     |
|----------------------------------------------------------------------------------------------------------|---------------------------------------|------------------------------------------|----------------------------|------------------------|-----------------------------------------------------------------------------------------------------------------------------------------------------------------------------------------------------------------------------------------------------------------------------------------------------------|
|                                                                                                          |                                       | White non-Hispanic (row %)               | Black non-Hispanic (row %) | Hispanic/Other (row %) |                                                                                                                                                                                                                                                                                                           |
| A. 100% racial concordance (assortativity) – base analysis                                               | White non-Hispanic                    | 100%                                     | 0%                         | 0%                     |                                                                                                                                                                                                                                                                                                           |
|                                                                                                          | Black non-Hispanic                    | 0%                                       | 100%                       | 0%                     |                                                                                                                                                                                                                                                                                                           |
|                                                                                                          | Hispanic/Other                        | 0%                                       | 0%                         | 100%                   |                                                                                                                                                                                                                                                                                                           |
| B. 90% racial concordance                                                                                | White non-Hispanic                    | 90%                                      | 5%                         | 5%                     |                                                                                                                                                                                                                                                                                                           |
|                                                                                                          | Black non-Hispanic                    | 5%                                       | 90%                        | 5%                     |                                                                                                                                                                                                                                                                                                           |
|                                                                                                          | Hispanic/Other                        | 5%                                       | 5%                         | 90%                    |                                                                                                                                                                                                                                                                                                           |
| C. 80% racial concordance                                                                                | White non-Hispanic                    | 80%                                      | 10%                        | 10%                    |                                                                                                                                                                                                                                                                                                           |
|                                                                                                          | Black non-Hispanic                    | 10%                                      | 80%                        | 10%                    |                                                                                                                                                                                                                                                                                                           |
|                                                                                                          | Hispanic/Other                        | 10%                                      | 10%                        | 80%                    |                                                                                                                                                                                                                                                                                                           |
| D. 80% black and white non-Hispanic, 60% Hispanic/Other concordance                                      | White non-Hispanic                    | 80%                                      | 10%                        | 10%                    |                                                                                                                                                                                                                                                                                                           |
|                                                                                                          | Black non-Hispanic                    | 10%                                      | 80%                        | 10%                    |                                                                                                                                                                                                                                                                                                           |
|                                                                                                          | Hispanic/Other                        | 20%                                      | 20%                        | 60%                    |                                                                                                                                                                                                                                                                                                           |
| E. Serodiscordant anal intercourse partnerships in the Involvement, MAN Project, and Checking In studies | White non-Hispanic                    | 77%                                      | 6%                         | 17%                    | Involvement and MAN Project studies (2010-2014) included HIV testing and conducted among white and black MSM only. <sup>5,6</sup> Checking In (2009-2010) was a national online study that did not include HIV testing and contributes estimates for only Hispanic/Other HIV-infected MSM. <sup>7,8</sup> |
|                                                                                                          | Black non-Hispanic                    | 6%                                       | 87%                        | 7%                     |                                                                                                                                                                                                                                                                                                           |
|                                                                                                          | Hispanic/Other                        | 30%                                      | 40%                        | 29%                    |                                                                                                                                                                                                                                                                                                           |
| F. All anal intercourse partnerships in the Checking In study                                            | White non-Hispanic                    | 64%                                      | 12%                        | 24%                    |                                                                                                                                                                                                                                                                                                           |
|                                                                                                          | Black non-Hispanic                    | 16%                                      | 68%                        | 16%                    |                                                                                                                                                                                                                                                                                                           |
|                                                                                                          | Hispanic/Other                        | 38%                                      | 19%                        | 43%                    |                                                                                                                                                                                                                                                                                                           |

**Appendix, Table 3.**  
**Results of sensitivity analyses of racial/ethnic mixing in serodiscordant relationships of MSM**

|                                                                                                          | Scenario 1:<br>Observed Continuum | Scenario 2:<br>Racially-equivalent<br>care |                           | Scenario 3:<br>Black MSM have 95%<br>diagnosis |                           | Scenario 4:<br>Black MSM have 95%<br>retention |                           | Scenario 5:<br>Black MSM have<br>concurrent 95%<br>diagnosis and 95%<br>retention |                           |
|----------------------------------------------------------------------------------------------------------|-----------------------------------|--------------------------------------------|---------------------------|------------------------------------------------|---------------------------|------------------------------------------------|---------------------------|-----------------------------------------------------------------------------------|---------------------------|
|                                                                                                          | Incidence rate ratio              | Incidence<br>rate ratio                    | Change from<br>Scenario 1 | Incidence<br>rate ratio                        | Change from<br>Scenario 1 | Incidence<br>rate ratio                        | Change from<br>Scenario 1 | Incidence<br>rate ratio                                                           | Change from<br>Scenario 1 |
| <b>Racial/ethnic mixing scenario</b>                                                                     |                                   |                                            |                           |                                                |                           |                                                |                           |                                                                                   |                           |
| A. 100% racial concordance                                                                               | 7.92                              | 5.80                                       | -27%                      | 5.81                                           | -27%                      | 5.93                                           | -25%                      | 3.28                                                                              | -59%                      |
| B. 90% racial concordance                                                                                | 7.91                              | 6.07                                       | -23%                      | 6.07                                           | -23%                      | 6.18                                           | -22%                      | 3.81                                                                              | -52%                      |
| C. 80% racial concordance                                                                                | 7.89                              | 6.35                                       | -20%                      | 6.35                                           | -20%                      | 6.44                                           | -18%                      | 4.39                                                                              | -44%                      |
| D. 80% black and white non-Hispanic, 60% Hispanic/Other concordance                                      | 7.89                              | 6.47                                       | -18%                      | 6.47                                           | -18%                      | 6.14                                           | -17%                      | 4.68                                                                              | -41%                      |
| E. Serodiscordant anal intercourse partnerships in the Involvement, MAN Project, and Checking In studies | 9.20                              | 7.62                                       | -17%                      | 7.62                                           | -17%                      | 7.71                                           | -16%                      | 5.66                                                                              | -38%                      |
| F. All anal intercourse partnerships in the Checking In study                                            | 9.22                              | 8.08                                       | -12%                      | 8.09                                           | -12%                      | 8.15                                           | -12%                      | 4.24                                                                              | -37%                      |

## References

1. Purcell DW, Johnson CH, Lansky A, Prejean J, Stein R, Denning P, et al. Estimating the Population Size of Men Who Have Sex with Men in the United States to Obtain HIV and Syphilis Rates. *The Open AIDS Journal*. 2012; 6: 98-107.
2. United States Census Bureau. National Intercensal Estimates (2000-2010)., 2010. Available at: <http://www.census.gov/popest/data/intercensal/national/nat2010.html> (Accessed August, 15, 2014)
3. Hall HI, Holtgrave DR, Tang T, Rhodes P. HIV transmission in the United States: considerations of viral load, risk behavior, and health disparities. *AIDS Behav*. 2013; 17(5): 1632-6.
4. Centers for Disease Control and Prevention. HIV Surveillance Report, 2011. Atlanta, GA. 2013. Available at: [http://www.cdc.gov/hiv/library/reports/surveillance/2011/surveillance\\_Report\\_vol\\_23.html](http://www.cdc.gov/hiv/library/reports/surveillance/2011/surveillance_Report_vol_23.html) (accessed August 15, 2014)
5. Grey JA, Rothenberg R, Sullivan PS, Rosenberg ES. Racial Differences in the Accuracy of Perceived Partner HIV Status among Men Who Have Sex with Men (MSM) in Atlanta, Georgia. *J Int Assoc Provid AIDS Care*. 2014 Oct 27. pii: 2325957414555226. [Epub ahead of print]
6. Rosenberg ES, Staple TS, Rothenberg RB, Sullivan PS. To what extent can men who have sex with men identify and contact their online sex partners? Results from a sexual networks study in Atlanta, GA. 2012 National STD Prevention Conference. Minneapolis, MN; 2012.
7. Khosropour CM, Johnson BA, Ricca AV, Sullivan PS. Enhancing retention of an Internet-based cohort study of men who have sex with men (MSM) via text messaging: randomized controlled trial. *Journal of medical Internet research*. 2013; 15(8): e194.
8. Winter AK, Sullivan PS, Khosropour CM, Rosenberg ES. Discussion of HIV Status by Serostatus and Partnership Sexual Risk Among Internet-Using MSM in the United States. *J Acquir Immune Defic Syndr*. 2012; 60(5): 525-9.
